# Supplementary material
Source: publisher figshare collection journal article supplement (https://acs.figshare.com/ndownloader/files/15204458)
Supplement: Supplementary file 1 [file 15204458]

## Supporting Information

# Single Primer Based Multi-site Strand Displacement Reaction Amplification Strategy for Rapid Detection of Terminal Deoxynucleotidyl Transferase Activity

Xinyan Liu <sup>a</sup>, Hao Wang <sup>a</sup>, Keqin Deng <sup>a,b,\*</sup>, Sharon Kwee <sup>b</sup>, Haowen Huang <sup>a</sup>, Liang Tang <sup>b,\*</sup>

<sup>a</sup> Key Laboratory of Theoretical Organic Chemistry and Function Molecule, Ministry of Education, School of Chemistry and Chemical Engineering, Hunan University of Science and Technology, Xiangtan 411201, P. R. China

<sup>b</sup> Department of Biomedical Engineering, The University of Texas at San Antonio, San Antonio, Texas 78249, United States

\* Corresponding author: keqindeng@hnust.edu.cn (K. Deng), Liang.Tang@utsa.edu (L. Tang).

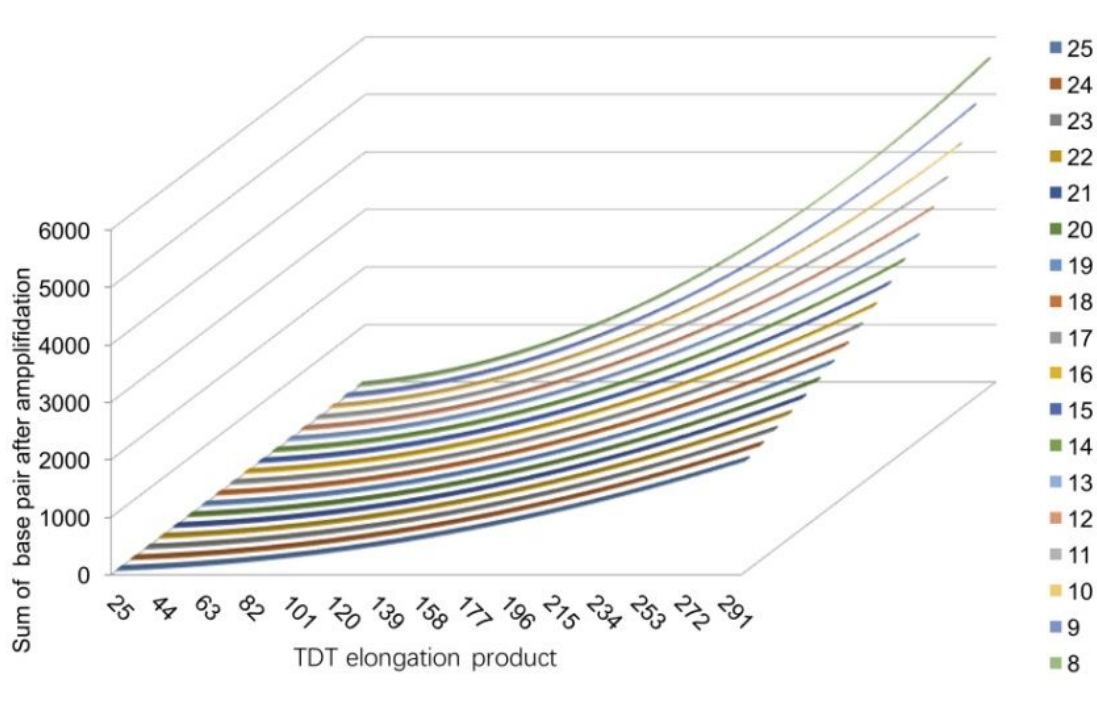

**Fig. S1** Relationship between the yield of final amplified product and primer length. The abscissa axis represents the average length of TdT extension product (the unit is bp), and the ordinate axis represents the total number of double-stranded base pairs in the final amplified product. The length of primer ranged from 8 to 25 bp and list on the left. We assume that the primer oligo dT contains n base units oligo (dT)<sub>n</sub>. The average length of TdT elongation product is x bases. Then the number of the total base pair (Tbp) produced from one piece of primer oligo dT<sub>n</sub> is  $Tbp = ((x^2/n) + x)/2$ .

From the principle of this strategy, it is obviously shorter primer can produce more dsDNA.

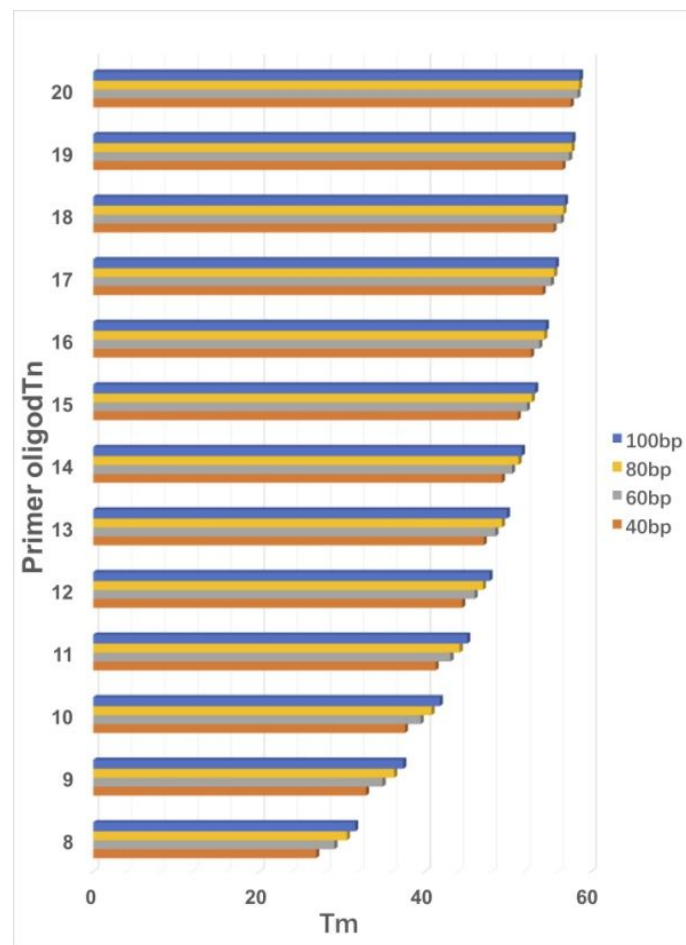

**Fig. S2** Relationship between the melting temperature (X-axis, the unit is °C) of hybrid product of primer-TdT elongation product and primer length (Y-axis, the unit is bp). The color bars represent assumed different length of TdT elongation product.

**Table S1.** Oligonucleotides used in the experiments.

| name | sequence (5'to 3')    |
|------|-----------------------|
| T8   | TTTTTTTT              |
| T9   | TTTTTTTTT             |
| T10  | TTTTTTTTTT            |
| T11  | TTTTTTTTTTT           |
| T12  | TTTTTTTTTTTT          |
| T15  | TTTTTTTTTTTTT         |
| T20  | TTTTTTTTTTTTTTTT      |
| T25  | TTTTTTTTTTTTTTTTT     |
| T30  | TTTTTTTTTTTTTTTTT     |
| T40  | TTTTTTTTTTTTTTTTT     |
| A20  | AAAAAAAAAAAAAAAAAAAA  |
| A30  | AAAAAAAAAAAAAAAAAAAAA |
| A40  | AAAAAAAAAAAAAAAAAAAAA |

**Table S2.** The comparison of our method with other methods of TdT activity detection.

| Sensors                                     | Detection limit (U)   | Linear range (U)                         | Total reaction time | Reference |
|---------------------------------------------|-----------------------|------------------------------------------|---------------------|-----------|
| G-quadruplexes                              | 0.05                  | 0.3 ~ 4                                  | 160min              | 24        |
| AgNC-based biosensors                       | 0.0318                | 0 ~ 3                                    | 205min              | 12        |
| iridium(III)-based i-motif probe            | 0.0125                | 0 ~ 0.4                                  | 130min              | 25        |
| TdT-generated polyT-templated CuNP strategy | 0.0375                | 0 ~ 5                                    | 135min              | 23        |
| quantum dot-based nanosensor                | $5 \times 10^{-5}$    | $2 \times 10^{-5} \sim 2 \times 10^{-2}$ | 70min               | 26        |
| DNA-AgNCs/GO/GCE                            | $4 \times 10^{-4}$    | 0.002~0.45                               | 197min              | 21        |
| DNA-CuNCs/GO/GCE                            | $5 \times 10^{-4}$    | 0.0025~0.8                               | 152min              | 20        |
| MSSDA                                       | $1.35 \times 10^{-5}$ | $4 \times 10^{-5} \sim 4 \times 10^{-2}$ | 95min               | This work |

**Table S3.** The recovery determination of TdT in artificial serum sample (n=4)

| Samples | Added<br>U | Found<br>U | Recovery<br>(%) | RSD<br>(%) |
|---------|------------|------------|-----------------|------------|
| Serum 1 | 0.0005     | 0.00054    | 108.2           | 9.7        |
| Serum 2 | 0.001      | 0.0011     | 110.0           | 8.5        |
| Serum 3 | 0.02       | 0.0187     | 93.5            | 11.3       |
